# Supplementary material for: Conjugated cyclized-polyacrylonitrile encapsulated carbon nanotubes as core–sheath heterostructured anodes with favorable lithium storage
Source: Royal Society of Chemistry journal article supplement (doi:10.1039/d0ta12243b), 2021-01-01
Supplement: d0ta12243b1.pdf [file d0ta12243b1.pdf]

## ***Supplementary Information for***

# **Conjugated cyclized-polyacrylonitrile encapsulated carbon nanotubes as core-sheath heterostructured anodes with favorable lithium storage**

**Qian Liu,<sup>‡a</sup> Zongyin Xiao,<sup>‡a</sup> Xun Cui,<sup>bc</sup> Shuyi Deng,<sup>c</sup> Qiming He,<sup>a</sup> Qing Zhang,<sup>a</sup>  
Zhiqun Lin,<sup>\*b</sup> and Yingkui Yang<sup>\*ac</sup>**

*<sup>a</sup> Key Laboratory of Catalysis and Energy Materials Chemistry of Ministry of Education & Hubei Key Laboratory of Catalysis and Materials Science, South-Central University for Nationalities, Wuhan 430074, China*

*E-mail: [ykyang@mail.scuec.edu.cn](mailto:ykyang@mail.scuec.edu.cn)*

*<sup>b</sup> School of Materials Science and Engineering, Georgia Institute of Technology, Atlanta, GA 30332, USA*

*E-mail: [zhiqun.lin@mse.gatech.edu](mailto:zhiqun.lin@mse.gatech.edu)*

*<sup>c</sup> Hubei Engineering Technology Research Centre of Energy Polymer Materials, School of Chemistry and Materials Science, South-Central University for Nationalities, Wuhan 430074, China*

*<sup>‡</sup> These two authors equally contributed to this work.*

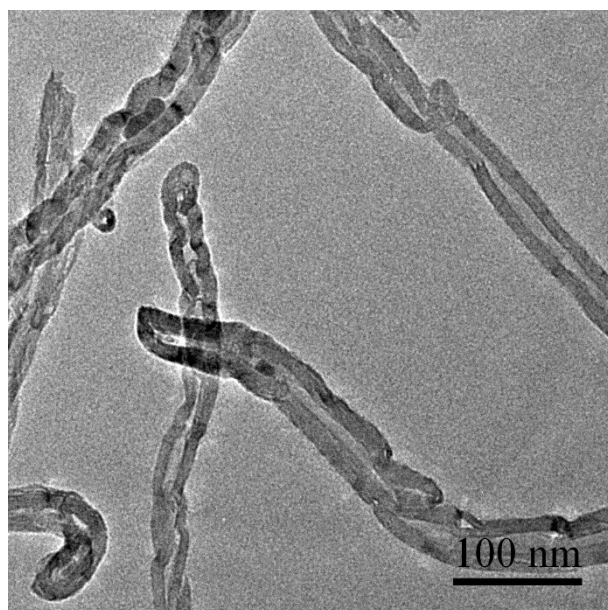

**Fig. S1** Typical TEM image of bare CNTs.

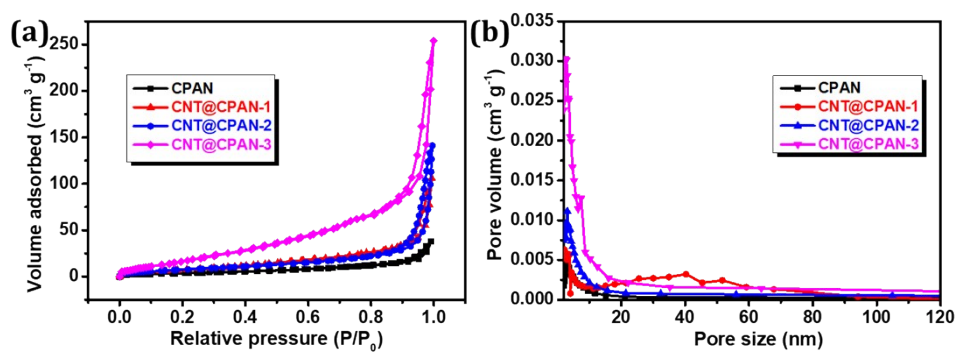

**Fig. S2**  $N_2$  adsorption/desorption isotherms and (b) pore size distributions of CPAN and its composites.

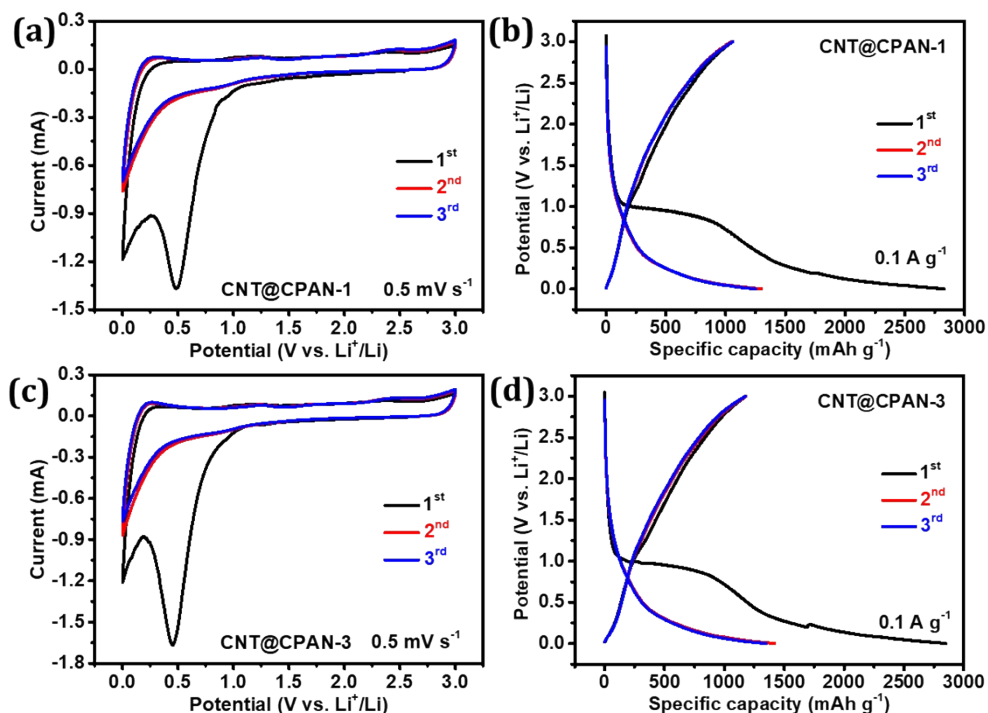

**Fig. S3** Typical CV curves of (a) CNT@CPAN-1 and (c) CNT@CPAN-3 at 0.5 mV s<sup>-1</sup>, and charge/discharge curves of (b) CNT@CPAN-1 and (d) CNT@CPAN-3 at 0.1 A g<sup>-1</sup> in the first three cycles.

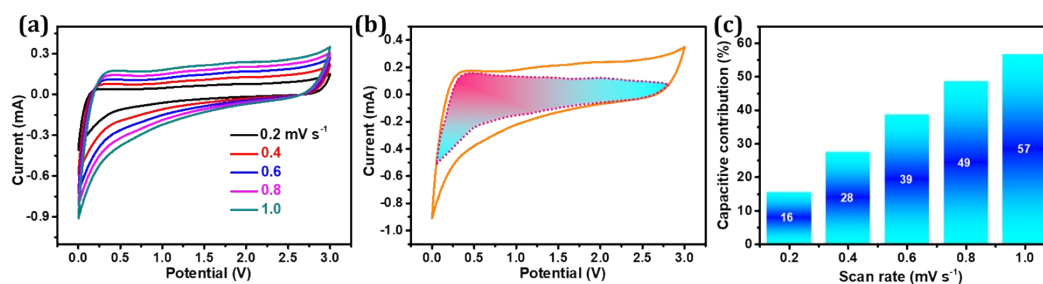

**Fig. S4** CPAN anode: (a) CV curves at scan rates from 0.2 to 10 mV s<sup>-1</sup>, (b) the decoupling of capacitive contribution (shadow) at 1 mV s<sup>-1</sup>, and (c) the normalized capacitive contribution at different scan rates.

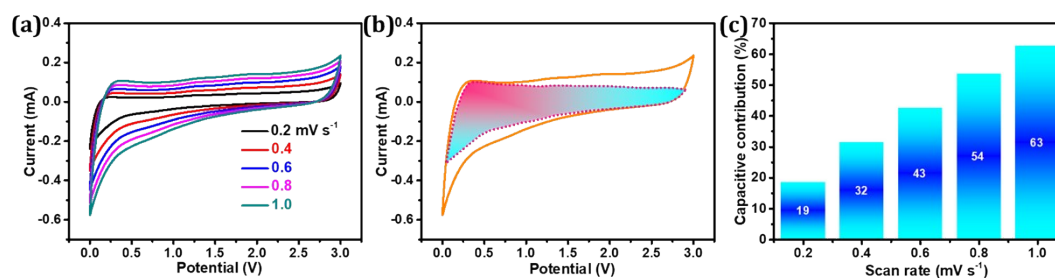

**Fig. S5 CNT@CPAN-1 anode:** (a) CV curves at scan rates from 0.2 to 10  $\text{mV s}^{-1}$ , (b) the decoupling of capacitive contribution (shadow) at 1  $\text{mV s}^{-1}$ , and (c) the normalized capacitive contribution at different scan rates.

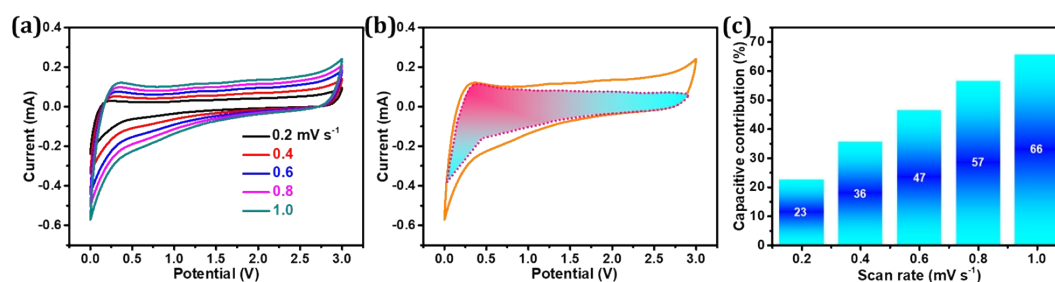

**Fig. S6 CNT@CPAN-2 anode:** (a) CV curves at scan rates from 0.2 to 10  $\text{mV s}^{-1}$ , (b) the decoupling of capacitive contribution (shadow) at 1  $\text{mV s}^{-1}$ , and (c) the normalized capacitive contribution at different scan rates.

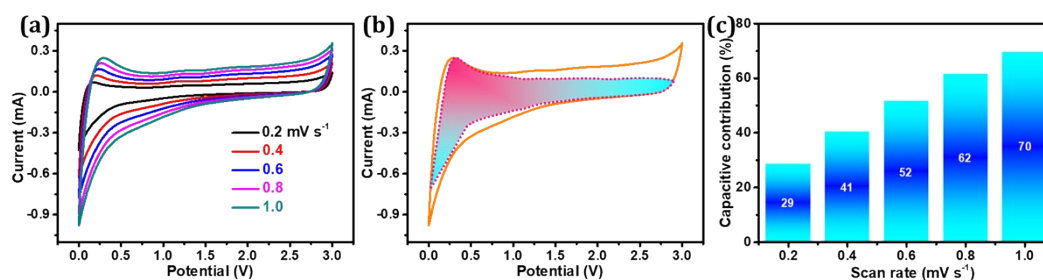

**Fig. S7 CNT@CPAN-3 anode:** (a) CV curves at scan rates from 0.2 to 10 mV s<sup>-1</sup>, (b) the decoupling of capacitive contribution (shadow) at 1 mV s<sup>-1</sup>, and (c) the normalized capacitive contribution at different scan rates.

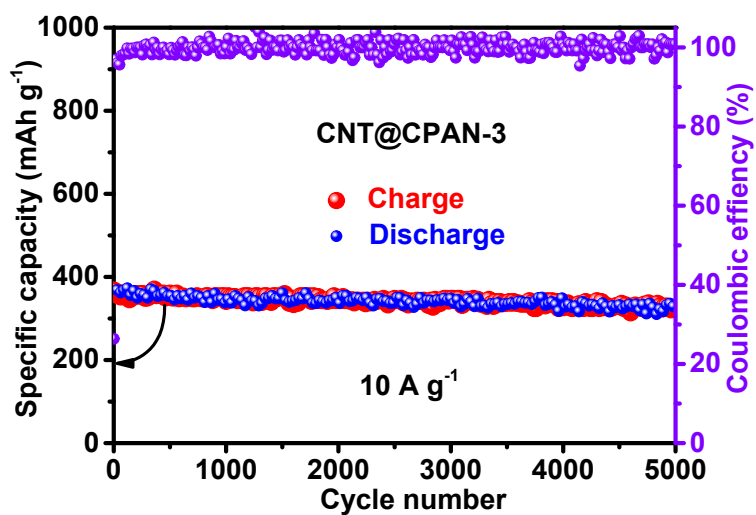

**Fig. S8** Long-term cycle life and the corresponding coulombic efficiency of CNT@CPAN-3 at a high rate of 10 A g<sup>-1</sup> for 5000 cycles.

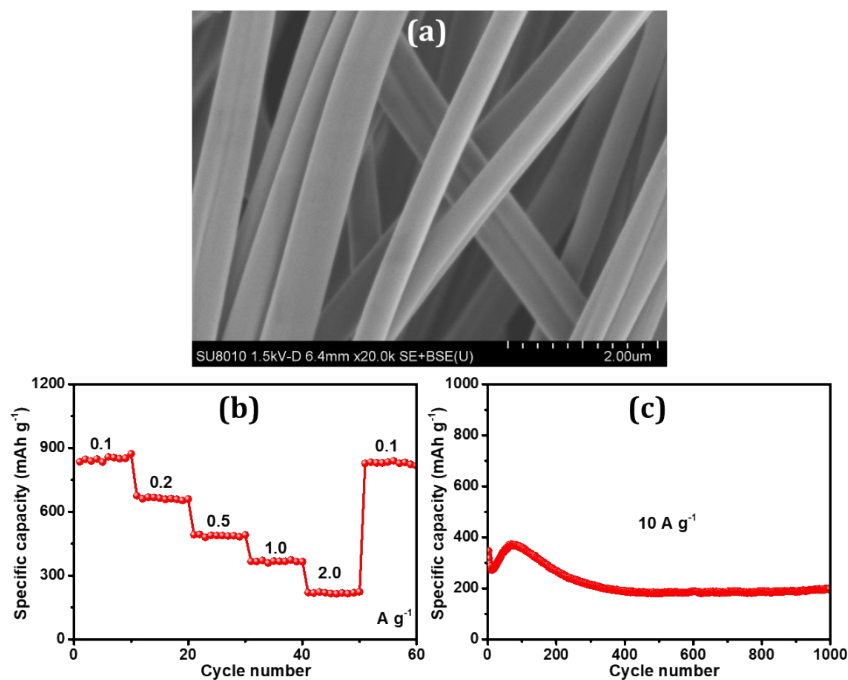

**Fig. S9** (a) SEM images of the electrospun CPAN fibers derived from the as-synthesized PAN; (b) reversible capacity at different rates, and (c) cycling stability at 10 A g<sup>-1</sup> for 1000 cycles.

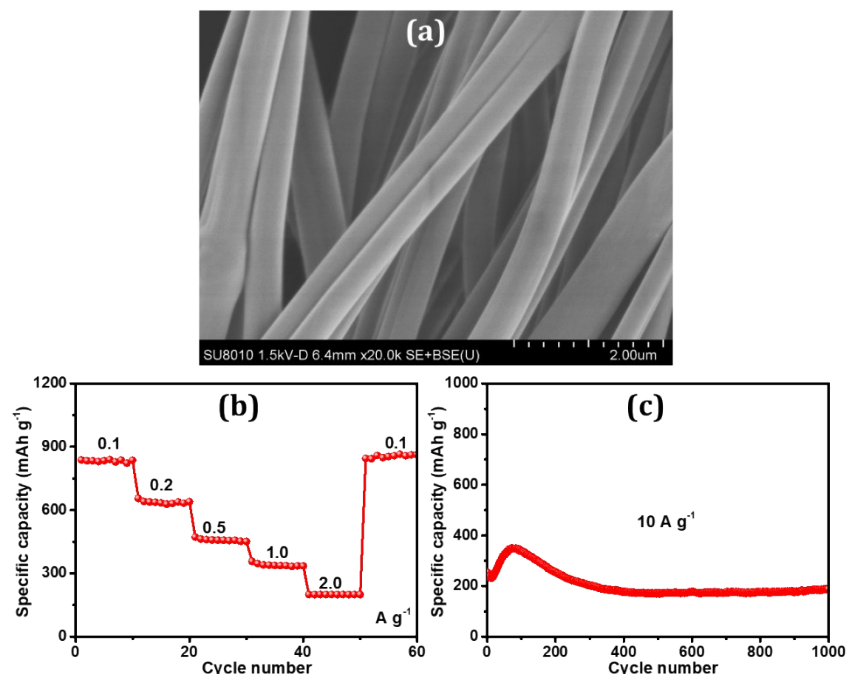

**Fig. S10** (a) SEM image of electrospun CPAN fibers using commercial polyacrylonitrile precursor; (b) reversible capacity at different rates, and (c) cycling stability at 10 A g<sup>-1</sup> for 1000 cycles.

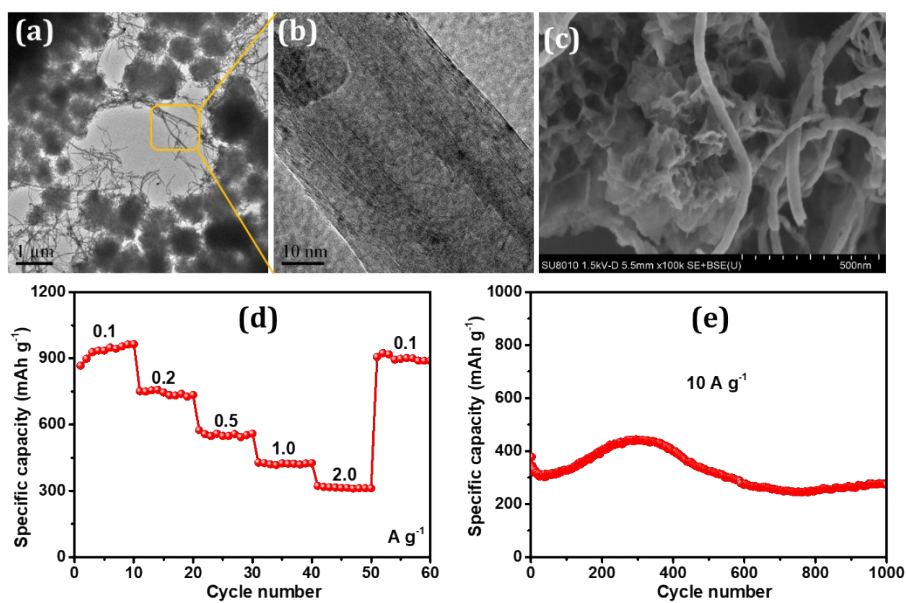

**Fig. S11** TEM (a) and (c) SEM images of the mixture of CPAN and CNTs where (b) CNTs are totally exposed without covering by CPAN; (d) reversible capacity at different rates, and (e) cycling stability at 10 A g<sup>-1</sup> for 1000 cycles.

**Table S1** Lithium storage performance of selected CNT@CPAN-3 anode and polymer-based anode counterparts reported in the references

| Polymers used                                                                       | Specific capacity                                       | Rate capability                                       | Cycling stability                                       | Ref. |
|-------------------------------------------------------------------------------------|---------------------------------------------------------|-------------------------------------------------------|---------------------------------------------------------|------|
| 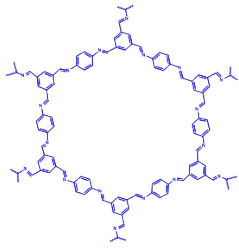   | 125 mAh g <sup>-1</sup><br>at 100 mA g <sup>-1</sup>    | —                                                     | 77.3% after<br>300 cycles<br>at 100 mA g <sup>-1</sup>  | [1]  |
|    | 149.97 mAh g <sup>-1</sup><br>at 100 mA g <sup>-1</sup> | 90.38 mAh g <sup>-1</sup><br>at 0.5 A g <sup>-1</sup> | 67.6% after<br>300 cycles<br>at 100 mA g <sup>-1</sup>  | [2]  |
|    | 745 mAh g <sup>-1</sup><br>at 45 mA g <sup>-1</sup>     | 141 mAh g <sup>-1</sup><br>at 3.0 A g <sup>-1</sup>   | 30% after<br>300 cycles<br>at 100 mA g <sup>-1</sup>    | [3]  |
|   | 85 mAh g <sup>-1</sup><br>at 100 mA g <sup>-1</sup>     | 99 mAh g <sup>-1</sup><br>at 1.0 A g <sup>-1</sup>    | 67% after<br>200 cycles<br>at 200 mA g <sup>-1</sup>    | [4]  |
|  | 160 mAh g <sup>-1</sup><br>at 30 mA g <sup>-1</sup>     | —                                                     | 57.1% after<br>50 cycles<br>at 30 mA g <sup>-1</sup>    | [5]  |
|  | 140 mAh g <sup>-1</sup><br>at 0.4 C                     | 60 mAh g <sup>-1</sup><br>at 16 C                     | —                                                       | [6]  |
|  | 1401 mAh g <sup>-1</sup><br>at 100 mA g <sup>-1</sup>   | 259 mAh g <sup>-1</sup><br>at 2.0 A g <sup>-1</sup>   | 97% after<br>1000 cycles<br>at 200 mA g <sup>-1</sup>   | [7]  |
|  | 206 mAh g <sup>-1</sup><br>at 20 mA g <sup>-1</sup>     | 167 mAh g <sup>-1</sup><br>at 0.4 A g <sup>-1</sup>   | ~100% after<br>1000 cycles at<br>400 mA g <sup>-1</sup> | [8]  |
|  | 387 mAh g <sup>-1</sup><br>at 72 mA g <sup>-1</sup>     | 155 mAh g <sup>-1</sup><br>at 0.72 A g <sup>-1</sup>  | —                                                       | [9]  |



|                                                                                     |                                                       |                                                     |                                                          |                  |
|-------------------------------------------------------------------------------------|-------------------------------------------------------|-----------------------------------------------------|----------------------------------------------------------|------------------|
| 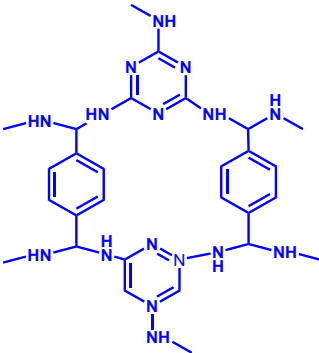   | 761 mAh g <sup>-1</sup><br>at 100 mA g <sup>-1</sup>  | 299 mAh g <sup>-1</sup><br>at 2.0 A g <sup>-1</sup> | —                                                        | [10]             |
|    | 972 mAh g <sup>-1</sup><br>at 100 mA g <sup>-1</sup>  | 419 mAh g <sup>-1</sup><br>at 2.0 A g <sup>-1</sup> | 87.8% after<br>1000 cycles<br>at 2500 mA g <sup>-1</sup> | [11]             |
|   | 50 mAh g <sup>-1</sup><br>at 50 mA g <sup>-1</sup>    | 15 mAh g <sup>-1</sup><br>at 10 A g <sup>-1</sup>   | —                                                        | [12]             |
|  | 175 mAh g <sup>-1</sup><br>at 0.1 C                   | 140 mAh g <sup>-1</sup><br>at 2.0 C                 | —                                                        | [13]             |
|  | 1176 mAh g <sup>-1</sup><br>at 100 mA g <sup>-1</sup> | 439 mAh g <sup>-1</sup><br>at 2.0 A g <sup>-1</sup> | 94% after<br>5000 cycles<br>at 10 A g <sup>-1</sup>      | <i>This work</i> |

---

## References

- [1] Z. D. Lei, Q. Yang, Y. Xu, S. Y. Guo, W. W. Sun, H. Liu, L.-P. Lv, Y. Zhang and Y. Wang, *Nat. Commun.*, 2018, **9**, 576.
- [2] Y. Aldawsari, Y. Mussa, F. Ahmed, M. Arsalan and E. Alsharaeh, *Materials*, 2019, **12**, 2248.
- [3] C. Zhang, Y. W. He, P. Mu, X. Wang, Q. He, Y. Chen, J. H. Zeng, F. Wang, Y. H. Xu and J. X. Jiang, *Adv. Funct. Mater.*, 2018, **28**, 1705432.
- [4] L. L. Cai, Y. H. Wen, J. Cheng, G. P. Cao and Y. S. Yang, *Acta Phys-Chim. Sin.*, 2016, **32**, 969-974.
- [5] L. Gou, H. X. Zhang, X. Y. Fan and D. L. Li, *Inorg. Chim. Acta*, 2013, **394**, 10-14.
- [6] Y. B. Sun, Y. H. Sun, Q. Y. Pan, G. Li, B. Han, D. L. Zeng, Y. F. Zhang and H. S. Cheng, *Chem. Commun.*, 2016, **52**, 3000-3002.
- [7] Z. M. Man, P. Li, D. Zhou, R. Zang, S. J. Wang, P. X. Li, S. S. Liu, X. M. Li, Y. H. Wu, X. H. Liang and G. X. Wang, *J. Mater. Chem. A*, 2019, **7**, 2368-2375.
- [8] Z. F. Sha, S. Q. Qiu, Q. Zhang, Z. Y. Huang, X. Cui, Y. K. Yang, Z. Q. Lin, *J. Mater. Chem. A*, 2019, **7**, 23019-23027.
- [9] Q. Yuan, C. X. Li, X. Guo, J. S. Zhao, Y. Zhang, B. Wang, Y. Y. Dong and L. X. Liu, *Energy Reports*, 2020, **6**, 2094-2105.
- [10] Z. D. Lei, X. D. Chen, W. W. Sun, Y. Zhang and Y. Wang, *Adv. Energy Mater.*, 2018, **9**, 1801010.
- [11] J. Xie, X. H. Rui, P. Y. Gu, J. S. Wu, Z. C. J. Xu, Q. Y. Yan and Q. C. Zhang, *ACS Appl. Mater. Interfaces*, 2016, **8**, 16932-16938.
- [12] S. X. Xu, W. Xu, L. J. Kong and Y. H. Zhang, *SN Appl. Sci.*, 2020, **2**, 2523-3963.
- [13] S. N. Zhang, S. Ren, D. M. Han, M. Xiao, S. J. Wang, L. Y. Sun and Y. Z. Meng, *ACS Appl. Mater. Interfaces.*, 2020, **12**, 36237-36246.
